# Supplementary material for: Optimizing polymyxin B exposure in carbapenem-resistant organism Hospital-Acquired Pneumonia: a retrospective observational study
Source: Research Square preprint supplement (doi:10.21203/rs.3.rs-7249423/v1), 2025-09-11
Supplement: Supplementary file 1 [file 948da14d94a9d5af37d68757.docx]

**Optimizing polymyxin B exposure in carbapenem-resistant organism Hospital-Acquired Pneumonia: a retrospective observational study**

Table S1. Pharmacokinetic outcomes of polymyxin B in enrolled patients

| **Variable** | **Total(n=138)** | **Clinical success(n=63)** | **Clinical failure (n=75)** | ***P*** |
| --- | --- | --- | --- | --- |
| AUC0-24h (mg·h/L) | 77.5 (55.6, 105.6) | 88.5 (71.2, 113.1) | 63.0 (48.4, 87.8) | <0.001 |
| Cmax (mg/L) | 6.4 (5.0, 8.9) | 7.8 (5.4, 9.7) | 5.8 (4.4, 7.7) | 0.002 |
| C6h (mg/L) | 2.5 (1.5, 3.5) | 3.3 (2.5, 4.3) | 1.9 (1.2, 3.0) | <0.001 |
| Cmin (mg/L) | 1.3 (0.7, 2.2) | 1.8 (1.2, 2.7) | 0.9 (0.6, 1.7) | <0.001 |

Data are mean (± SD), n (%), or median (IQR). AUC0-24h = Area under the 24-hour drug concentration-time curve of PMB; Cmax = PMB peak concentration; C6h = PMB blood concentration 6 hours after administration; Cmin = PMB trough concentration.

Table S2. Collinearity analysis in logistic regression modeling of PMB AUC0-24h's impact on 14-day clinical treatment success rates in CRO-HAP patients

| **Variables** | Age | Sex | BMI | SOFA at admission | VIS24hmax | AUC0-24h |
| --- | --- | --- | --- | --- | --- | --- |
| **VIF** | 1.04 | 1.03 | 1.07 | 1.39 | 1.44 | 1.07 |

Table S3. Collinearity analysis in logistic regression modeling of PMB AUC0-24h's impact on AKI incidence in CRO-HAP patients

| **Variables** | Age | Sex | SOFA at admission | VIS24hmax | GFR | AUC0-24h |
| --- | --- | --- | --- | --- | --- | --- |
| **VIF** | 1.14 | 1.23 | 1.45 | 1.21 | 1.47 | 1.28 |


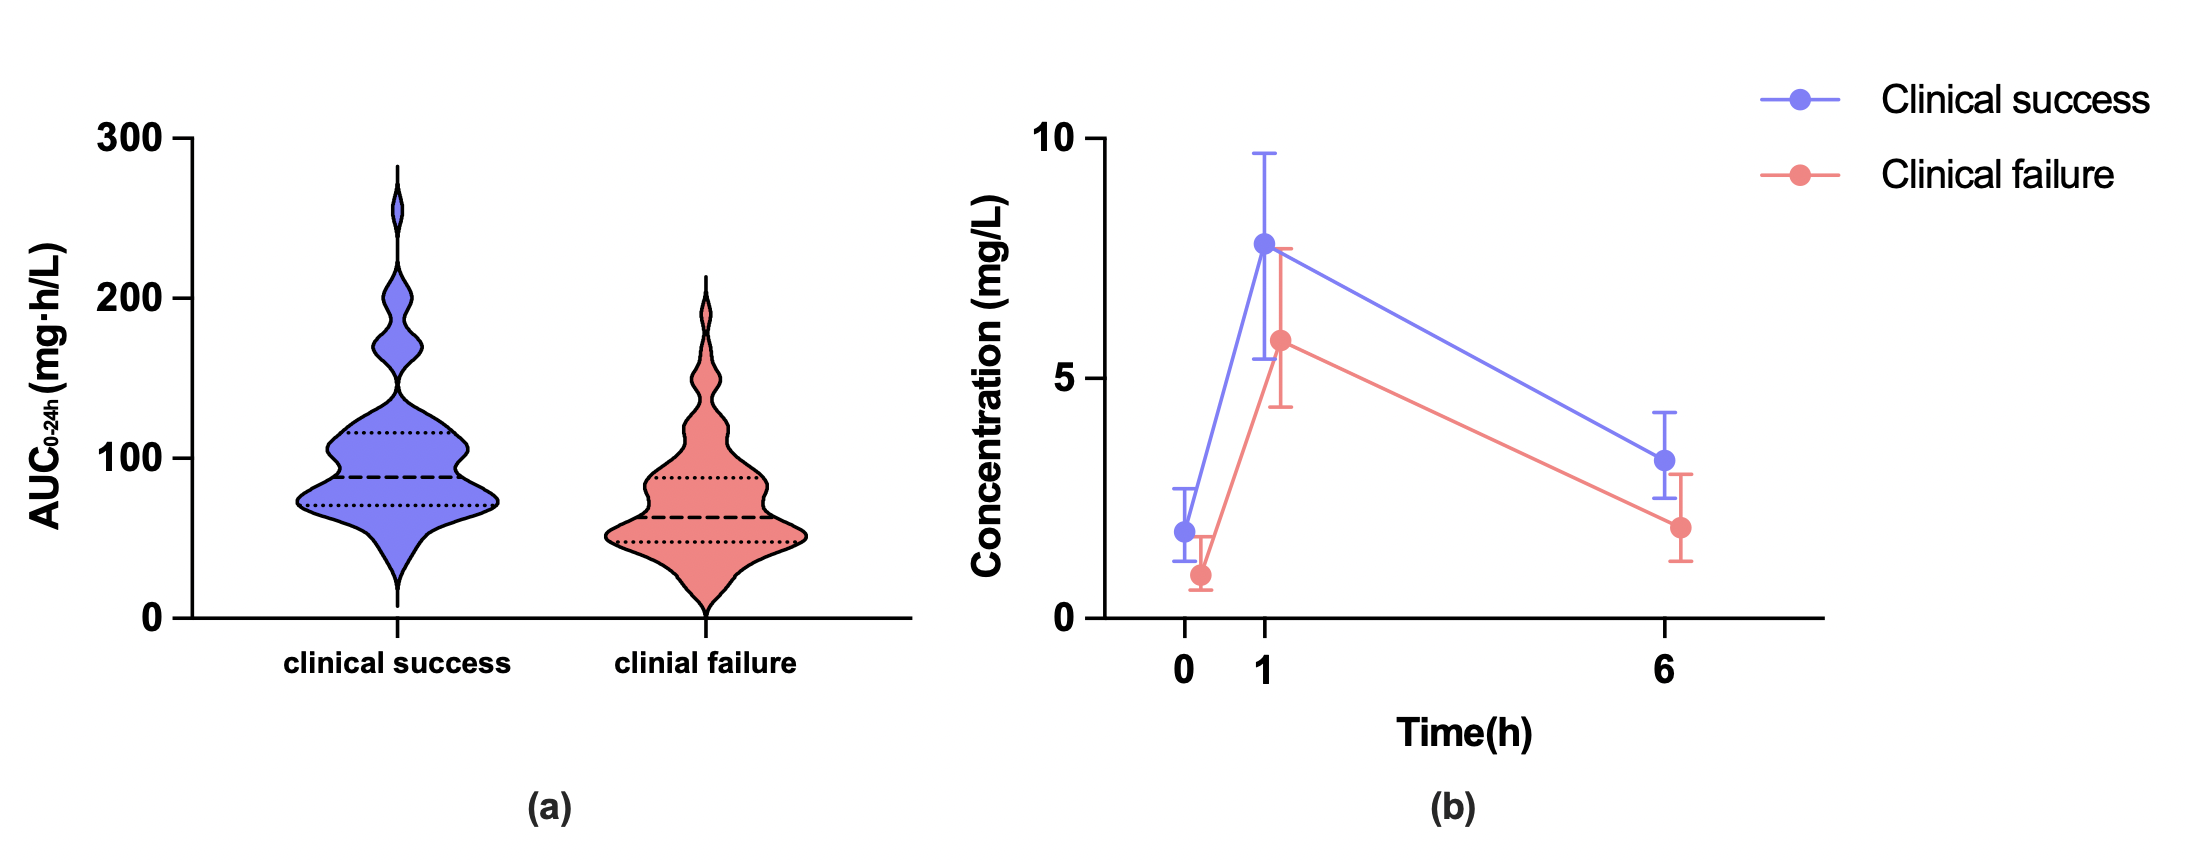


Figure S1. (a) Distribution of the AUC0-24h of PMB in enrolled patients; (b) Concentration-time curve of polymyxin B in enrolled patients


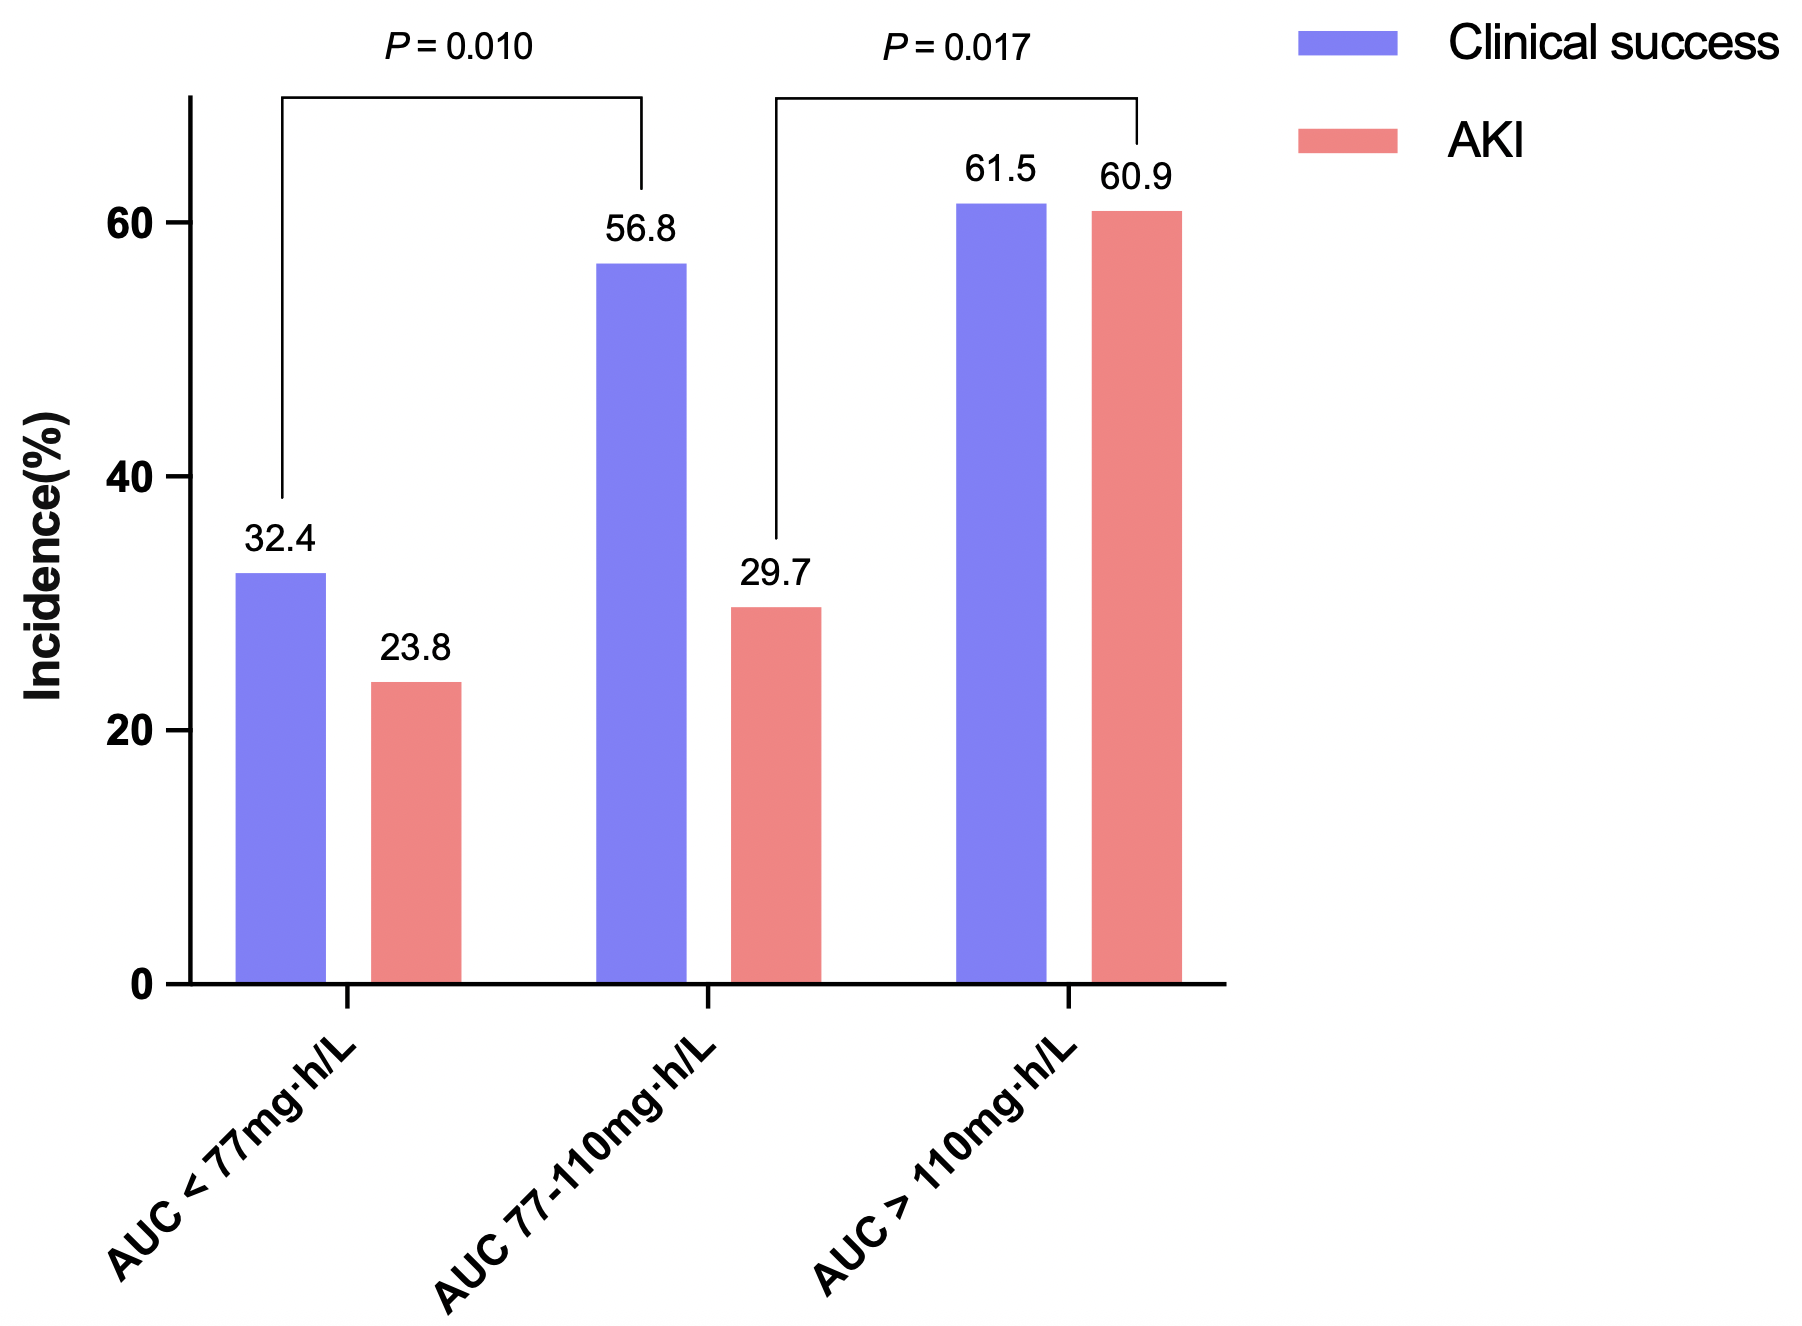


Figure S2. Distribution of 14-day clinical treatment success rates and AKI incidence stratified by AUC0-24h thresholds in patients with CRO-HAP


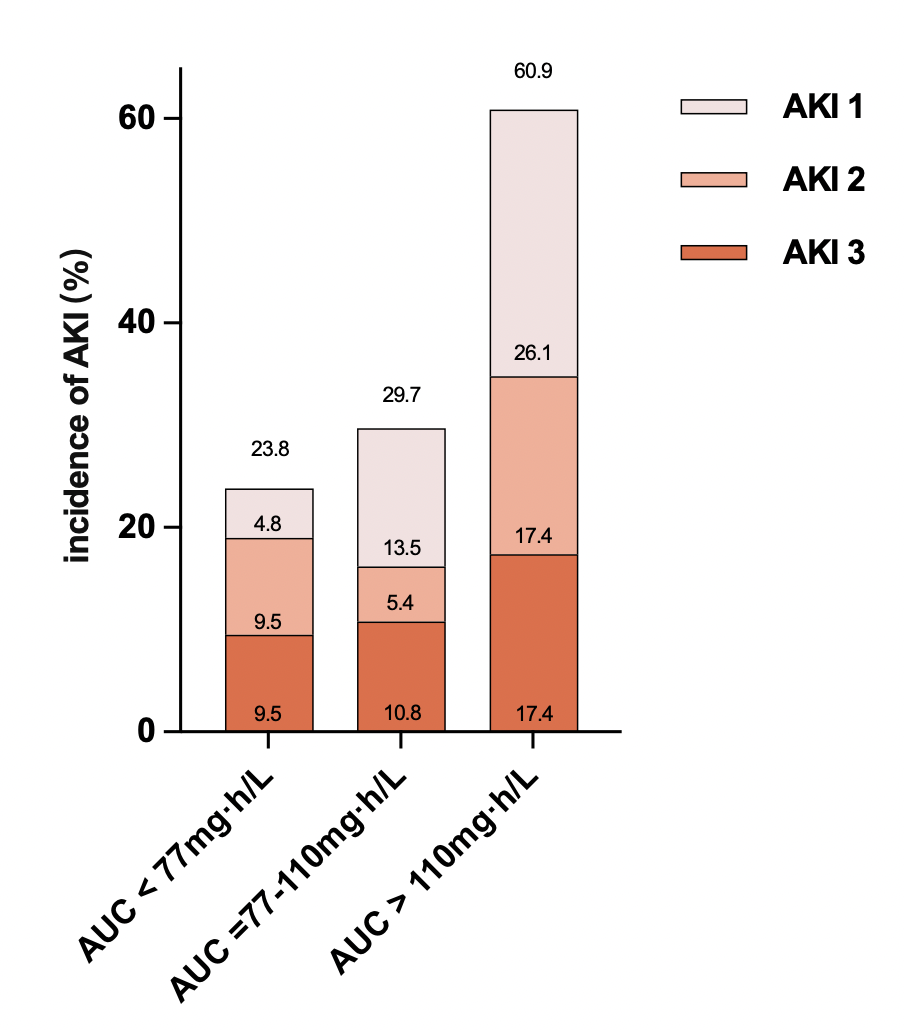


Figure S3. Distribution of the AKI incidence and stage in patients with CRO-HAP
